# Supplementary material
Source: HighWire-hosted journal article supplement (https://bmjopensem.bmj.com/content/1/1/e000050)

**Supplementary digital content 5:** Screenshot of the Graphical User Interface used to calculate fat infiltration

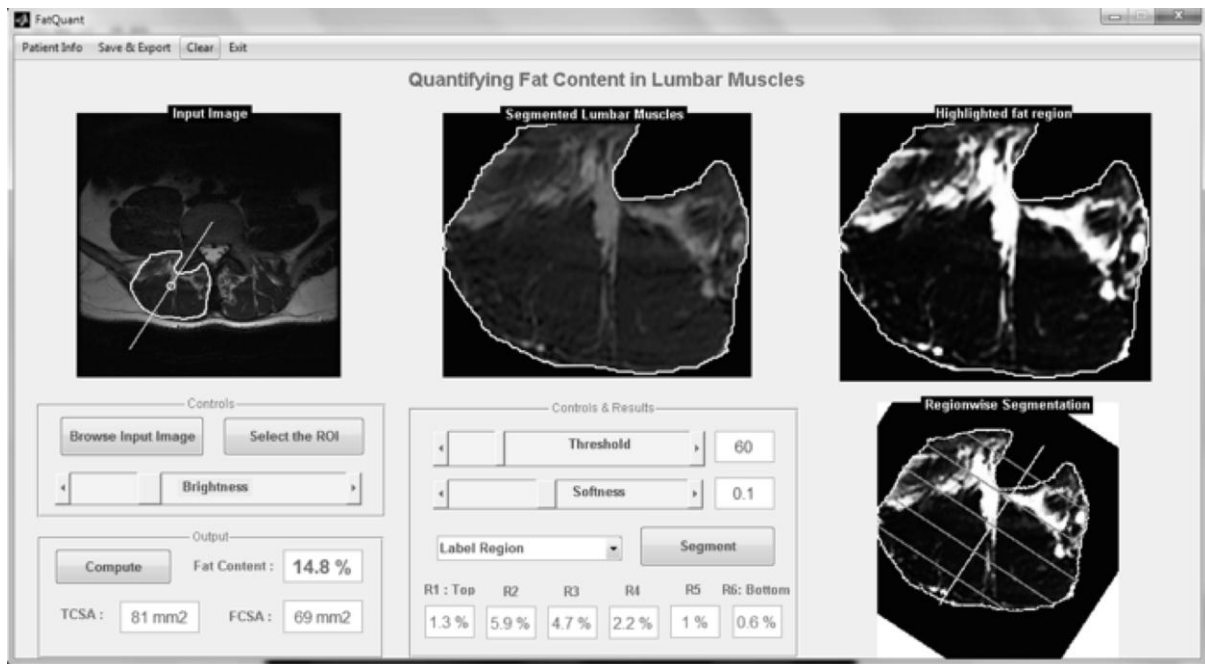

Supplement: inline-supplementary-material-5 [file inline-supplementary-material-5.pdf]
