# Supplementary material
Source: HighWire-hosted journal article supplement (https://bmjopensem.bmj.com/content/1/1/e000050)

**Supplementary digital content 1: Flow chart of the experimental design**

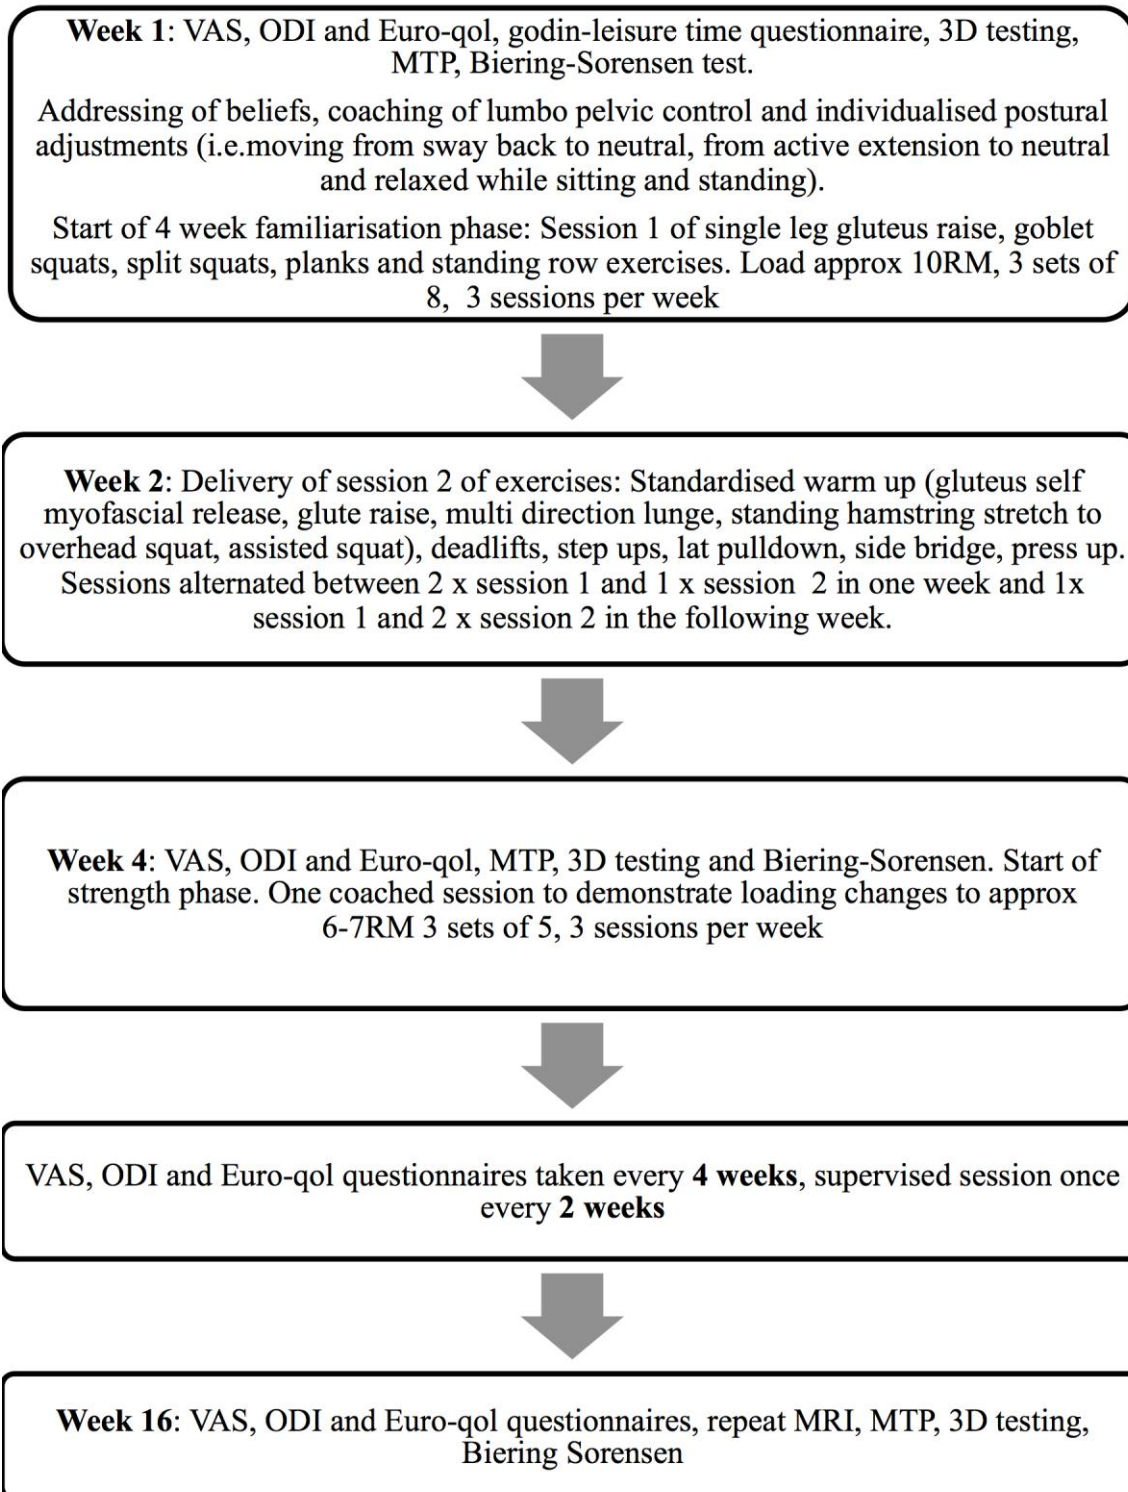

Supplement: inline-supplementary-material-1 [file inline-supplementary-material-1.pdf]

**Supplementary digital content 4:** Equipment set up for Isometric Mid thigh pull test

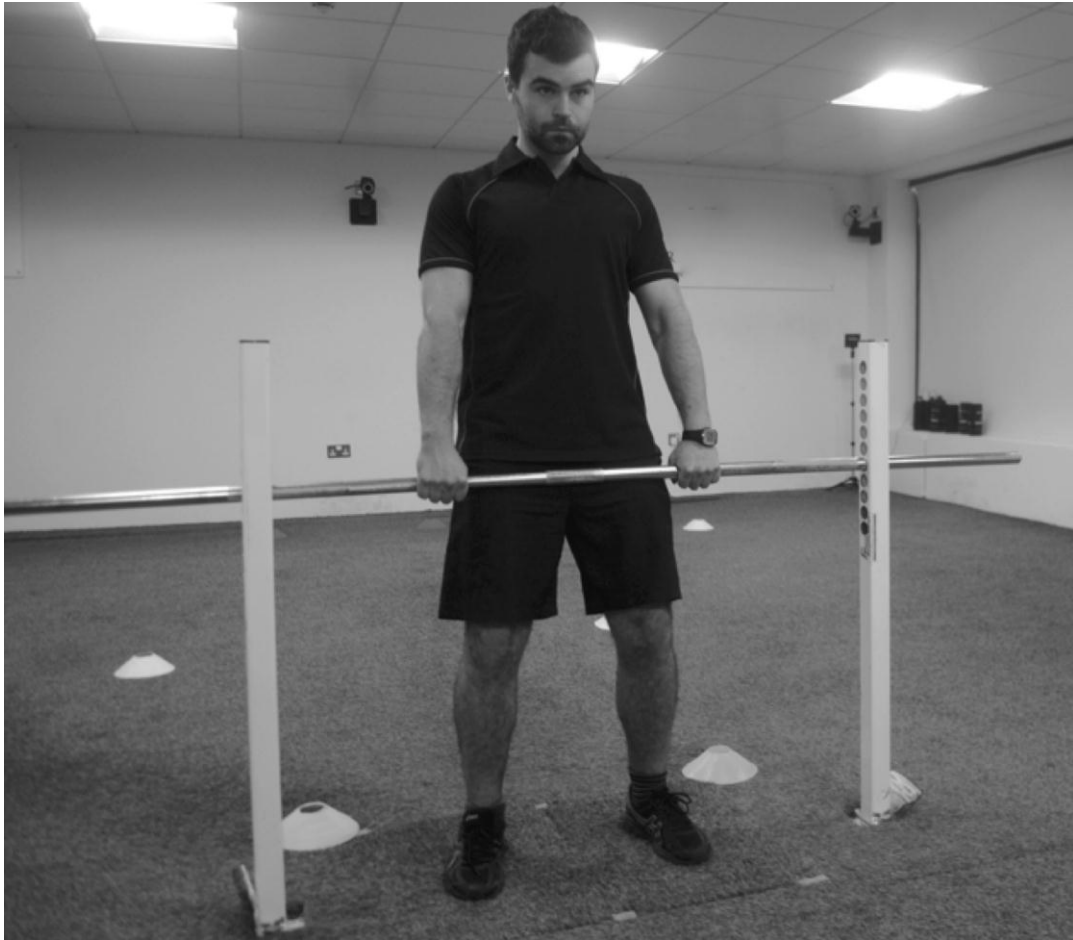

Supplement: inline-supplementary-material-4 [file inline-supplementary-material-4.pdf]
